# Supplementary material for: Influence of the Cross-Link Density on the Rate of Crystallization of Poly(ε-Caprolactone)
Source: PubMed Central journal article supplement (PMC6404166; doi:10.3390/polym10080902), 2018-08-11

Supplementary material for "Influence of the cross-link density on the rate of crystallization of poly( $\epsilon$ -caprolactone)"  
Avrami model plots of conventional DSC data

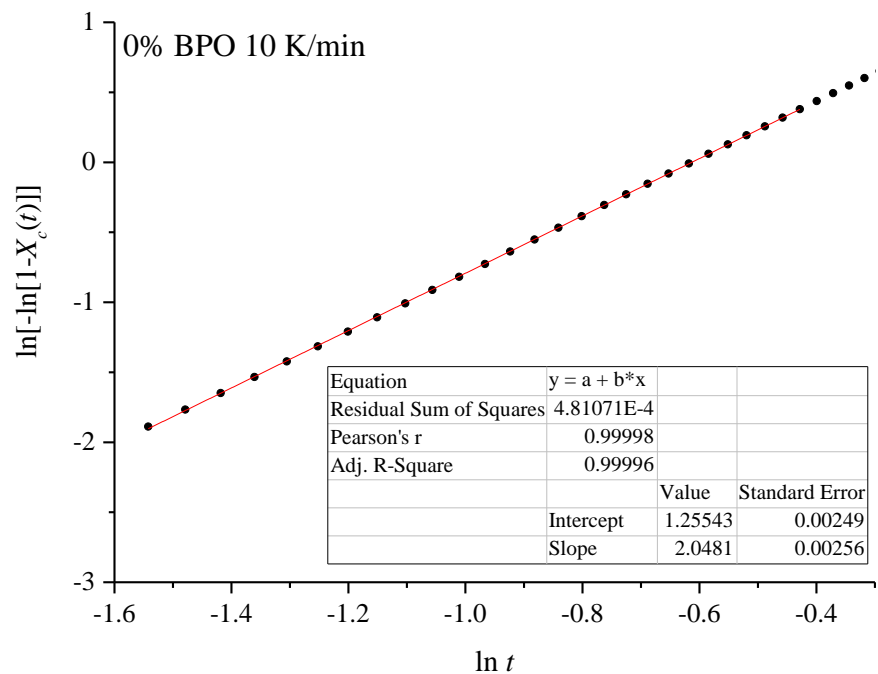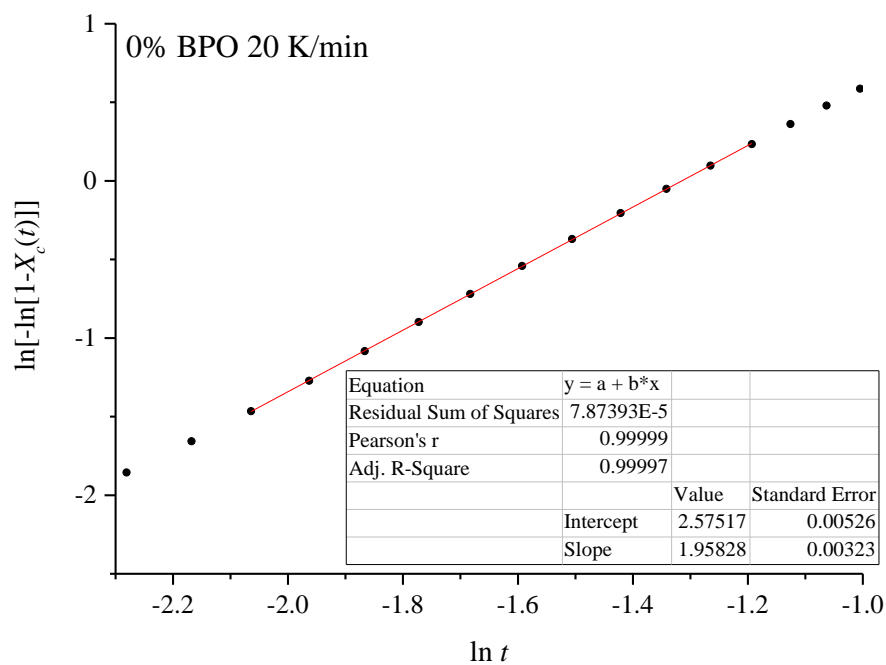

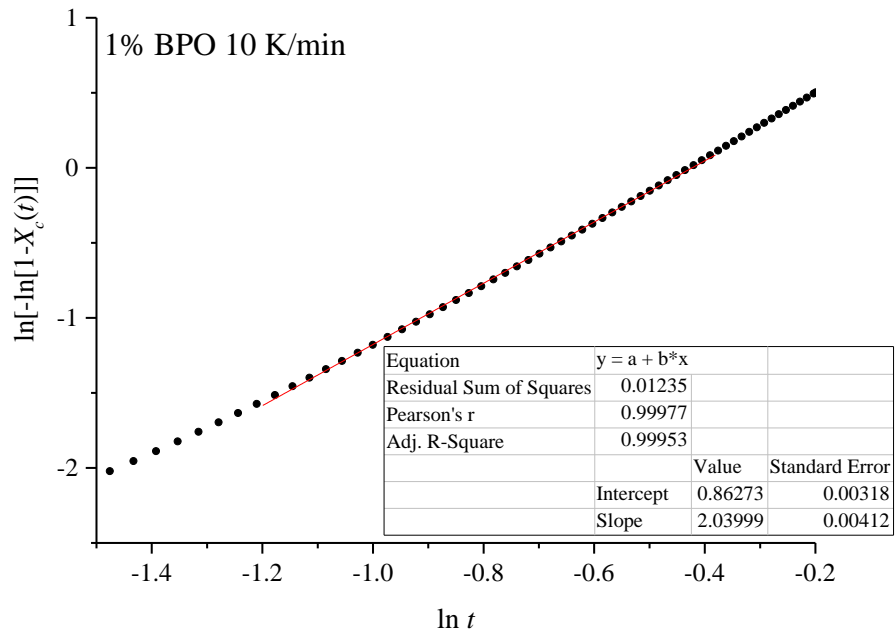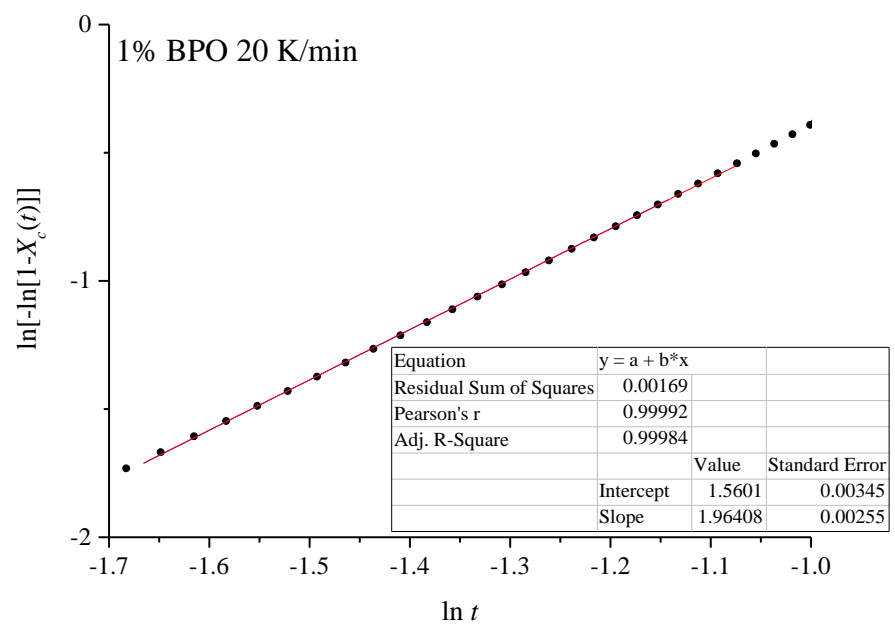

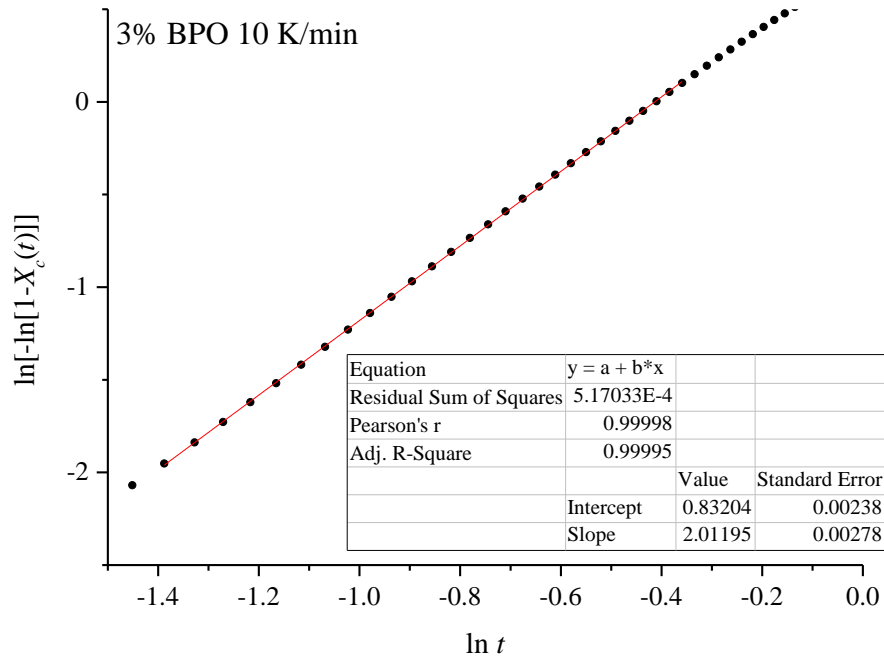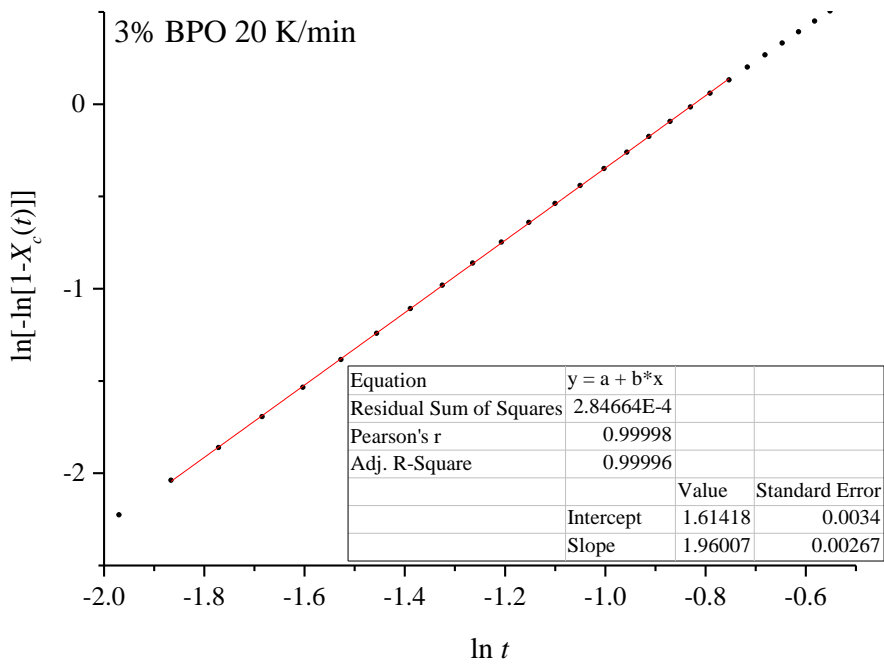

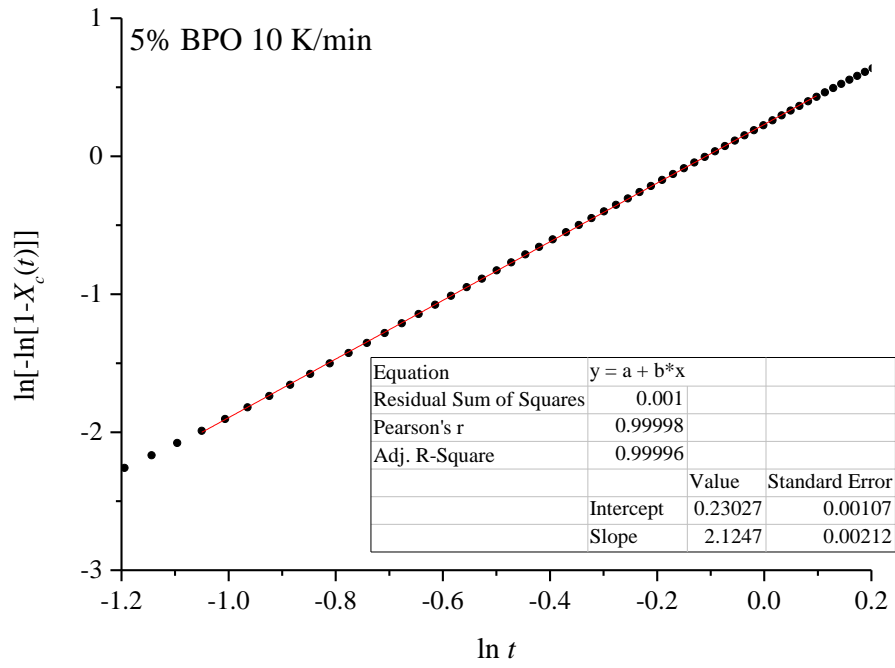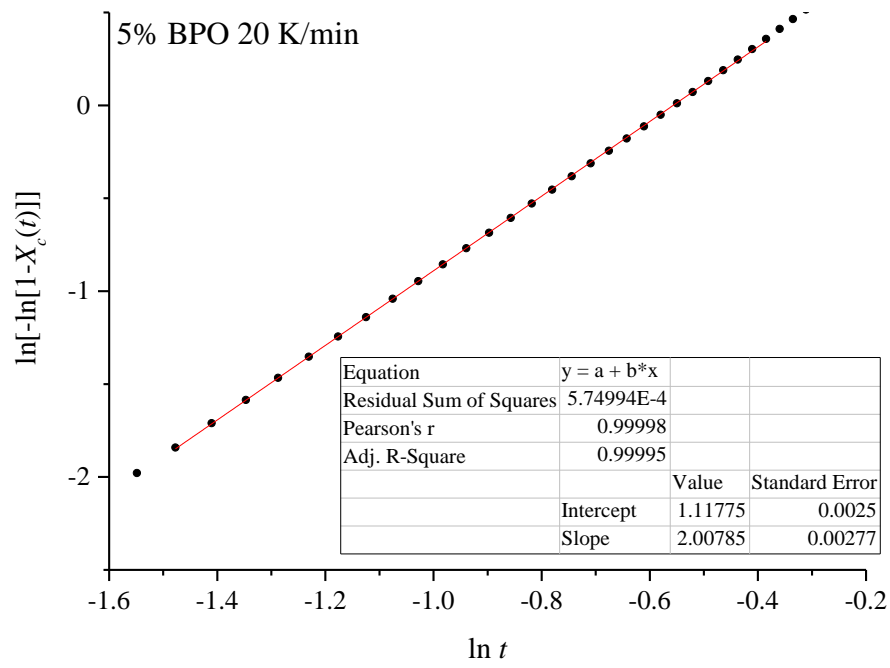

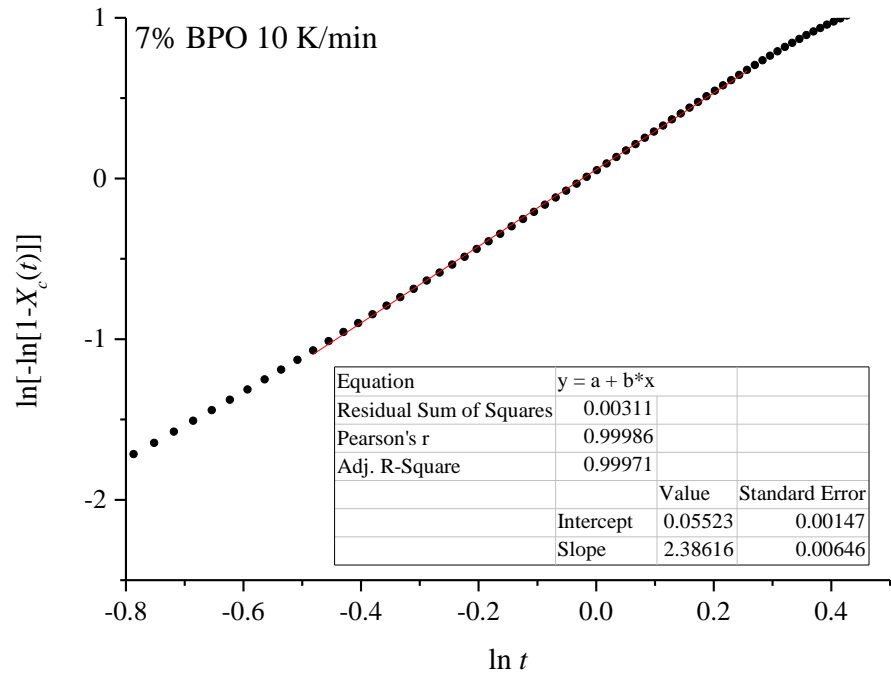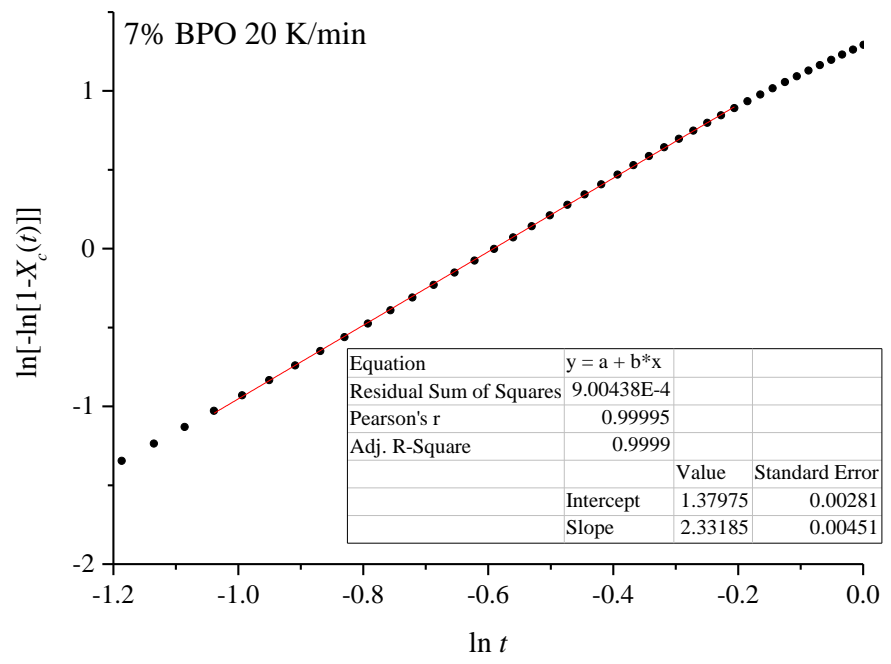

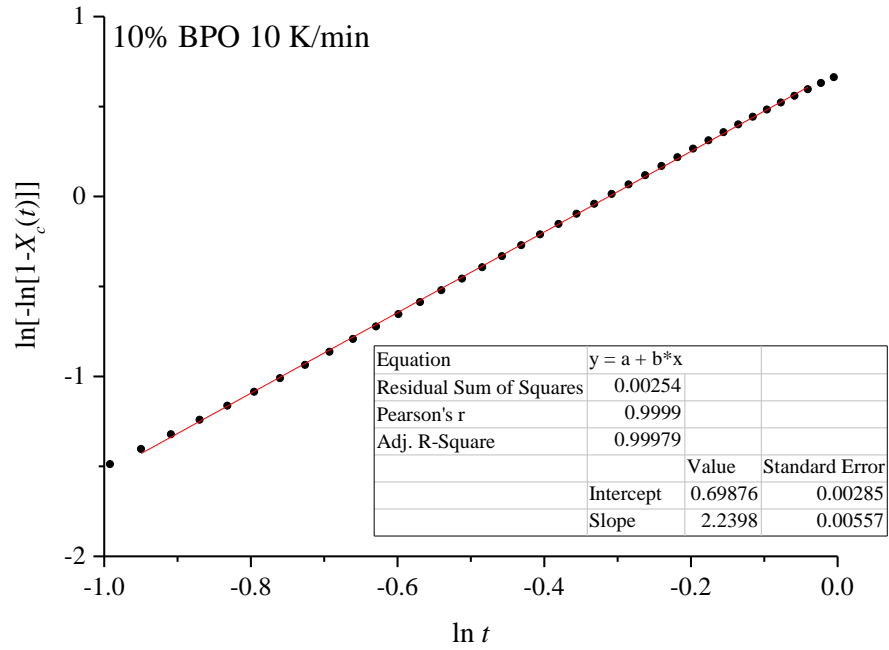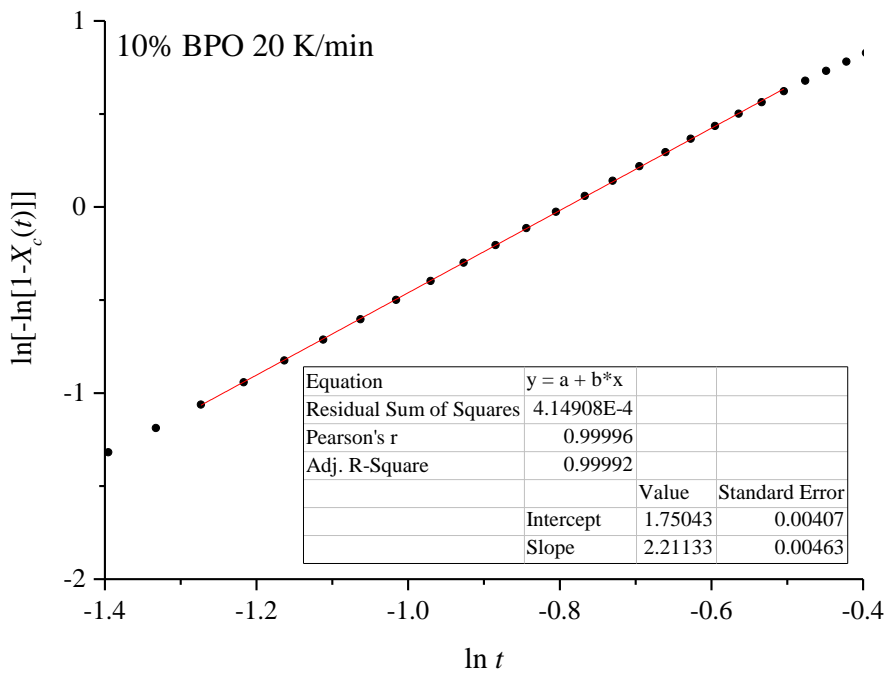

Supplement: polymers-10-00902-s001.pdf [file polymers-10-00902-s001.pdf]
